# Supplementary material for: Interventions for the well-being of healthcare workers during a pandemic or other crisis: scoping review
Source: HighWire-hosted journal article supplement (doi:10.1136/bmjopen-2020-047498), 2021-08-01
Supplement: bmjopen-2020-047498supp001_data_supplement.pdf [file bmjopen-2020-047498supp001_data_supplement.pdf]

**Precise search strategy for OVID MEDLINE which contains PubMed**

Table A1. Exact MeSH, Boolean Search Terms

|                                                                                                                                                                                                                                                                                                                                                                                                                                                                                                                                                                                                                                                                                                                                                                                                                                        |
|----------------------------------------------------------------------------------------------------------------------------------------------------------------------------------------------------------------------------------------------------------------------------------------------------------------------------------------------------------------------------------------------------------------------------------------------------------------------------------------------------------------------------------------------------------------------------------------------------------------------------------------------------------------------------------------------------------------------------------------------------------------------------------------------------------------------------------------|
| <p>((Epidemic* OR Pandemic* OR Human Influenza OR Disease Outbreaks OR Smallpox OR Dengue Virus OR Middle East Respiratory Syndrome Coronavirus OR HIV Infections OR Coronavirus Infections OR SARS-CoV-2.mp OR COVID-19.mp OR Porcine Respiratory Coronavirus OR Ebola Haemorrhagic Fever OR ebola.mp OR H1N1 OR "Swine flu" OR Viral Pneumonia OR disaster* OR catastrophe OR crisis OR crises)</p> <p>AND</p> <p>("health personnel" OR physician OR doctor*)</p> <p>AND</p> <p>(Psychological Stress OR Physiological Stress OR Occupational Stress OR Psychological Burnout OR Professional Burnout OR Depression OR Health Promotion OR Self Care OR Mental Health OR Workload OR Suicide OR Fear OR Emotions OR Mental Health OR Post-Traumatic Stress Disorders OR Wounds and Injuries OR Dehydration OR Hunger OR Sleep))</p> |
|----------------------------------------------------------------------------------------------------------------------------------------------------------------------------------------------------------------------------------------------------------------------------------------------------------------------------------------------------------------------------------------------------------------------------------------------------------------------------------------------------------------------------------------------------------------------------------------------------------------------------------------------------------------------------------------------------------------------------------------------------------------------------------------------------------------------------------------|

No limits or filters were added for the searches. Therefore the whole database from 1946 to October 2020 was searched.
